# Supplementary material for: Association between human herpesvirus-6 encephalitis and antiviral prophylaxis after allogeneic hematopoietic stem cell transplantation in the letermovir era
Source: Springer Nature journal article supplement (doi:10.1038/s41409-024-02313-3), 2024-05-25

# Supplemental Figure 1

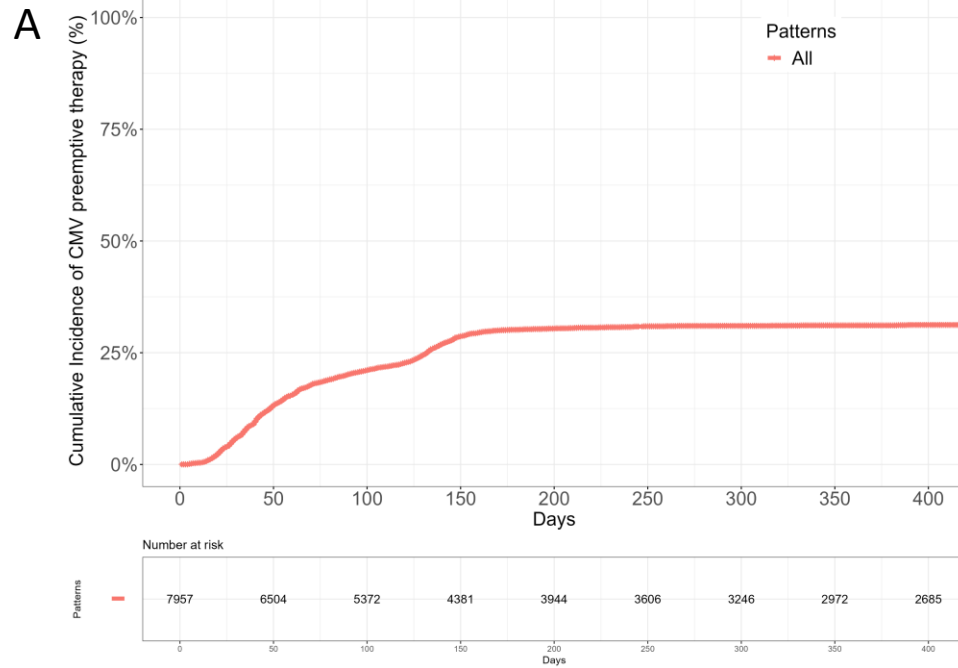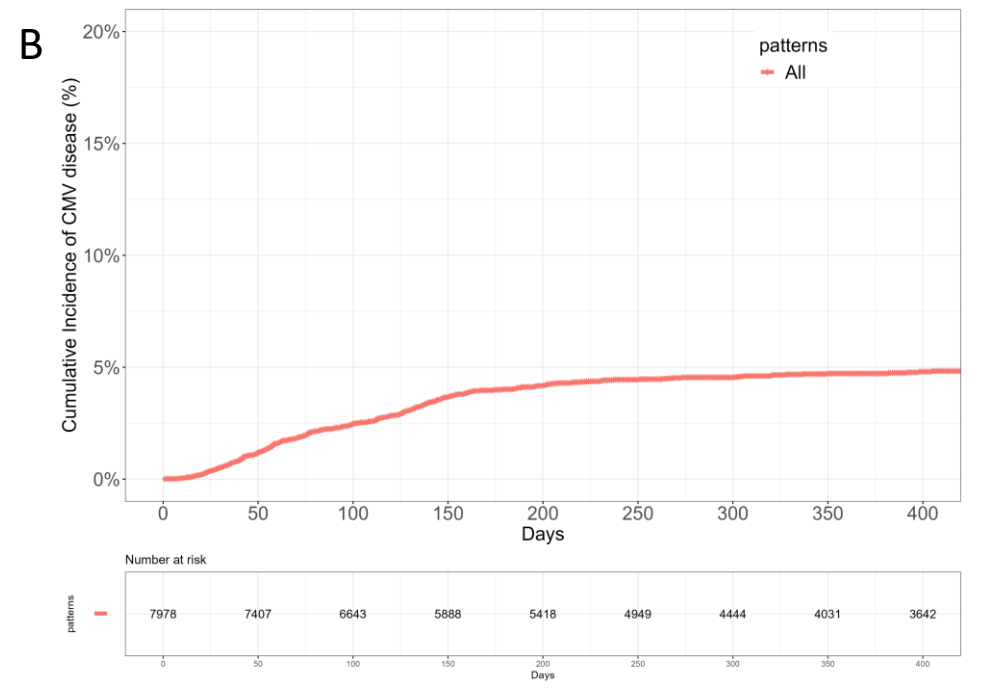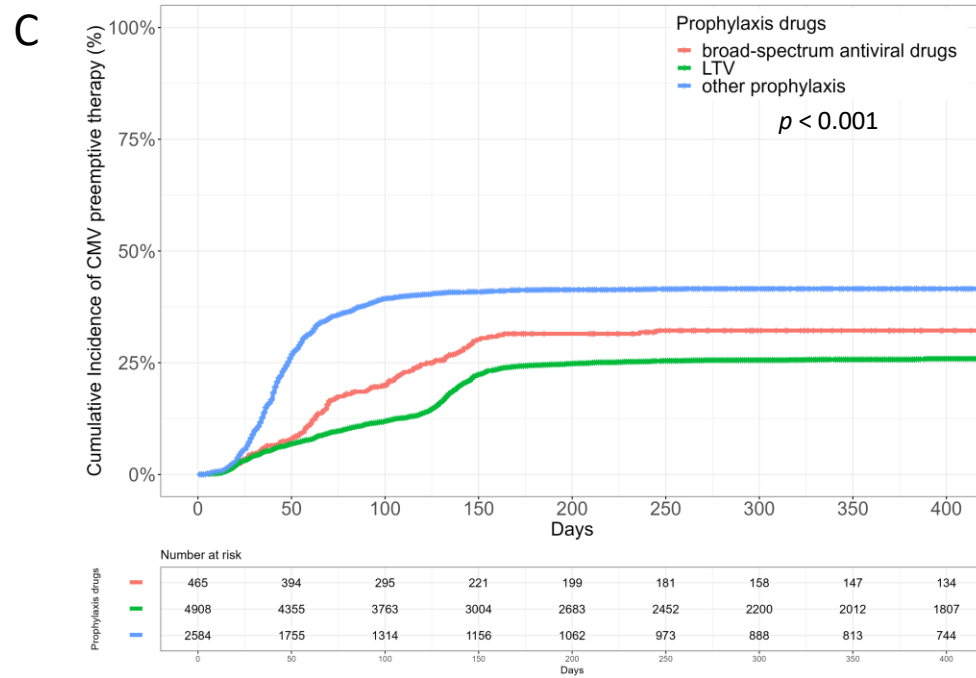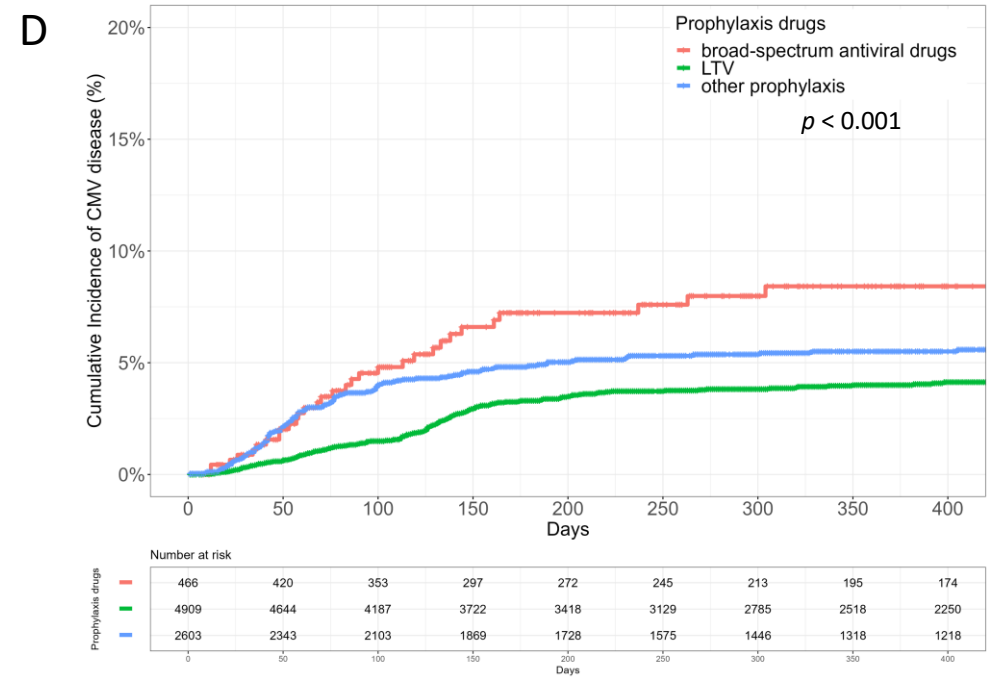

Supplement: 41409_2024_2313_MOESM2_ESM.pdf [file 41409_2024_2313_MOESM2_ESM.pdf]
